# Supplementary material
Source: publisher figshare collection journal article supplement (https://frontiersin.figshare.com/ndownloader/files/12314195)
Supplement: Supplementary file [file 12314195]

## *Supplementary Material*

### **Microbially Mediated Methylation of Arsenic in the Arsenic-rich Soils and Sediments of Jiangnan Plain**

Xian-Chun Zeng \*, Ye Yang, Wanxia Shi, Zhaofeng Peng, Xiaoming Chen, Xianbin Zhu, Yanxin Wang

\* **Correspondence:** Xian-Chun Zeng: [xianchun.zeng@gmail.com](mailto:xianchun.zeng@gmail.com); [xianchun\\_zeng@hotmail.com](mailto:xianchun_zeng@hotmail.com).

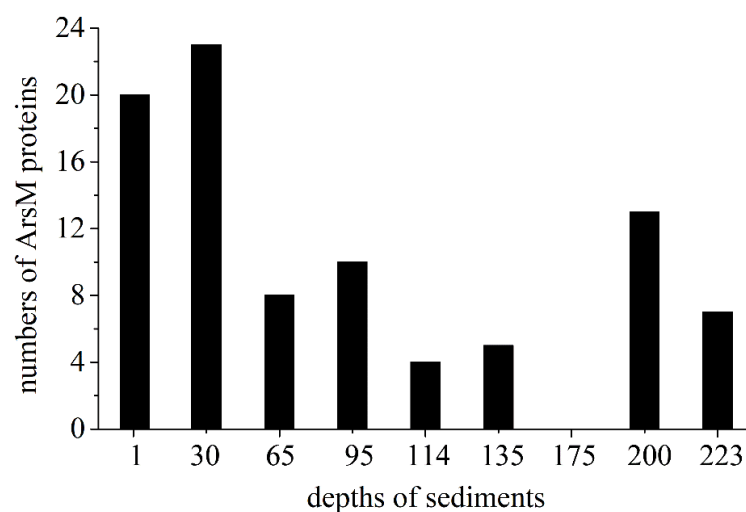

**Figure S1.** The numbers of different ArsM proteins identified from the microbial community of each sample from the depths of 1-223 m.
